# Supplementary material
Source: PubMed Central journal article supplement (PMC6816087)
Supplement: supp_RA119.008597_144515_2_supp_377957_pw5c02.pdf [file supp_RA119.008597_144515_2_supp_377957_pw5c02.pdf]

17 $\beta$ -Estradiol phosphorylates cystathionine  $\gamma$ -lyase and induces vascular endothelial H<sub>2</sub>S release via nongenomic modulation of pGC-A/cGMP/PKG signaling

Xingyan Xu<sup>1#</sup>, Qing Yan<sup>1#</sup>, Xiaoyun Liu<sup>1</sup>, Ping Li<sup>1</sup>, Xiaosa Li<sup>1</sup>, Yiwen Chen<sup>1</sup>, Tommaso Simoncini<sup>2</sup>, Junxiu Liu<sup>3\*</sup>, Dongxing Zhu<sup>1\*</sup>, Xiaodong fu<sup>1\*</sup>

From the <sup>1</sup>Department of Gynecology and Obstetrics, The Sixth Affiliated Hospital, Key Laboratory of Cardiovascular Diseases, School of Basic Medical Sciences, Guangzhou Medical University, Guangzhou 510260, China; <sup>2</sup>Molecular and Cellular Gynecological Endocrinology Laboratory (MCGEL), Department of Reproductive Medicine and Child Development, University of Pisa, Pisa 56100, Italy; <sup>3</sup> Department of Gynecology and Obstetrics, the First Affiliated Hospital of Sun Yat-sen University, Guangzhou 510080, China.

### Supporting Figure S1

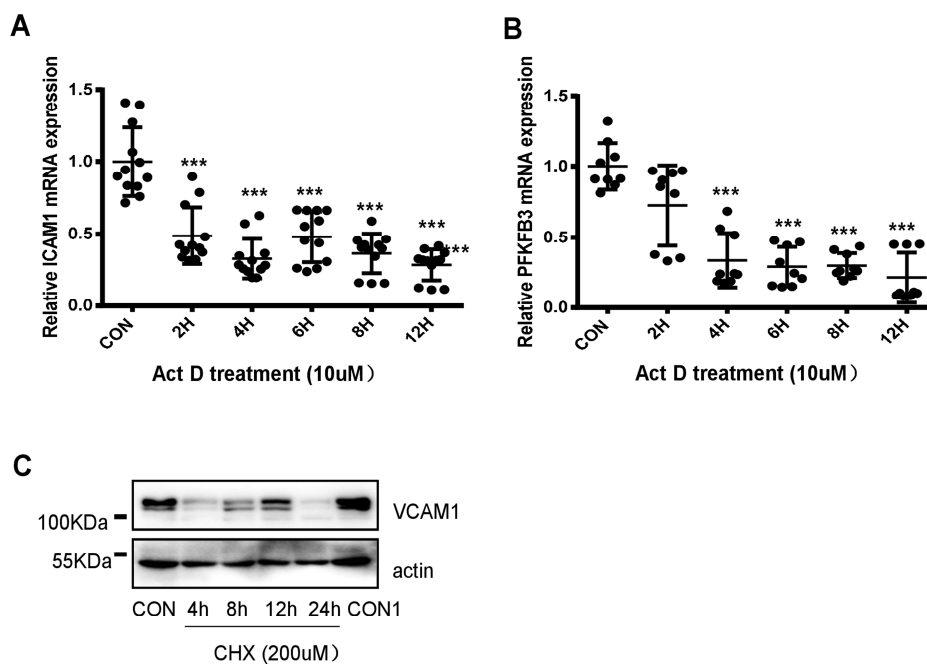

**Figure S1. ActD and CHX used in the present study successfully prevented transcription of ICAM1 and PFKFB3 and translation of VCAM1.** A-B. HUVECs were treated with 10 $\mu$ M Act D as the indicated time points, qPCR was performed to examine the expression of ICAM1 and PFKFB3 mRNA levels (mean  $\pm$  SD, n=12 technical replicates, \*\*\*P<0.001, vs CON, one way-ANOVA followed by the post-hoc LSD test). C, HUVECs were treated with 10 $\mu$ M Act D as the indicated time points, western blot was performed to examine the protein expression of VCAMC1.

## Supporting Figure S2

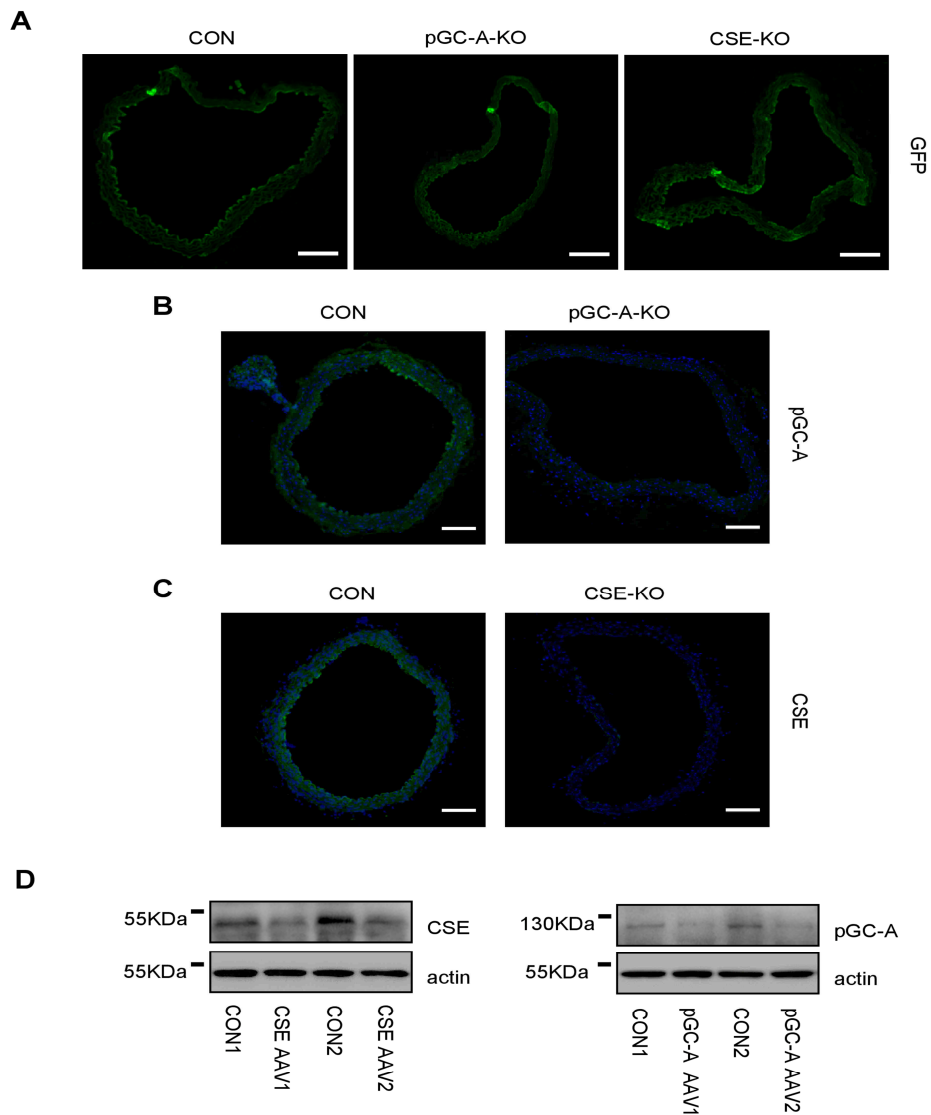

**Figure S2. Validation of AAV mediated knockdown efficiency of pGC-A and CSE.** Mice at 8 weeks of age were injected from the tail vein with AAV-control-shRNA, AAV-pGC-A-shRNA, AAV-CSE-shRNA. After 4 weeks, the aortae were dissected out for immunofluorescence staining and western blot. A. GFP positive cells showed that AAV-mediated shRNA was efficiently delivered to the aorta. B-C. immunofluorescence staining of pGC-A and CSE. D. Western blot of pGC-A and CSE.

## Supporting Figure S3

Figure 2A

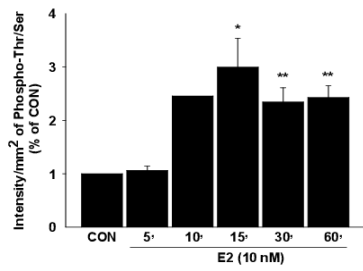

Figure 3A

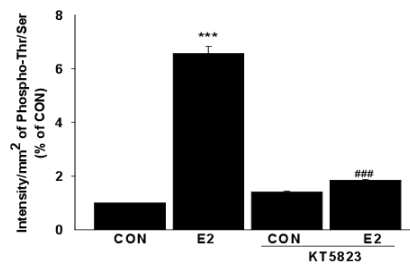

Figure 3C

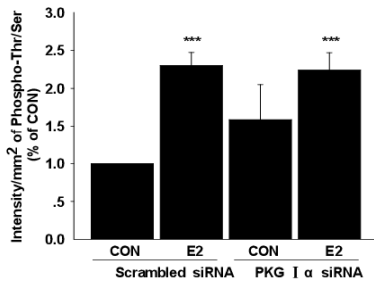

Figure 3D

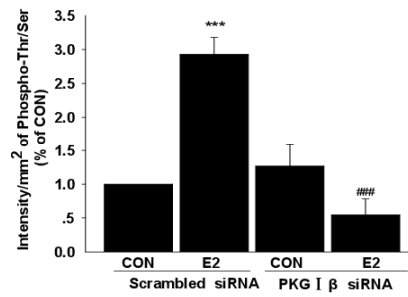

Figure 4C

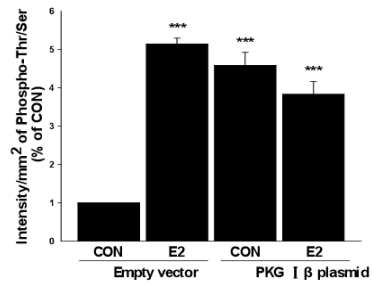

Figure 4D

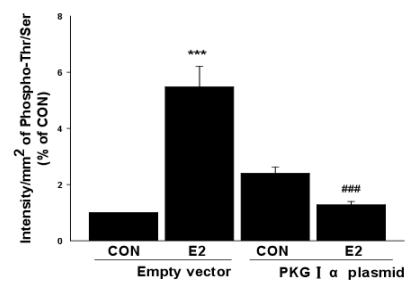

Figure S3. Semi-quantitative analysis of western blot for Figure 2 to Figure 4.

## Supporting Figure S4

Figure 6E

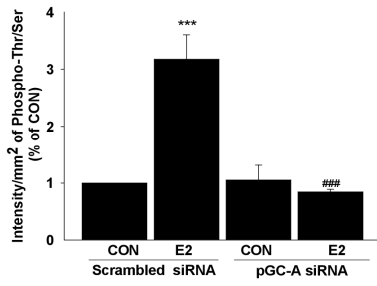

Figure 6G

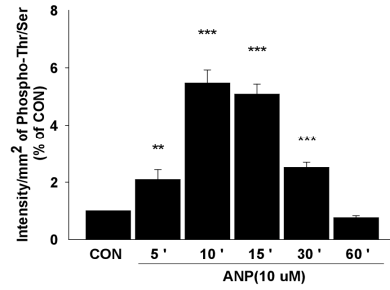

Figure 7D

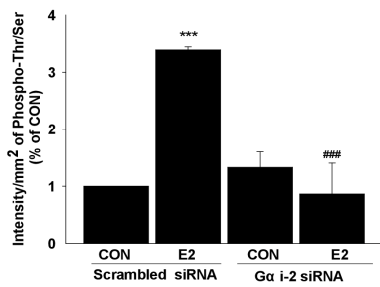

Figure 7E

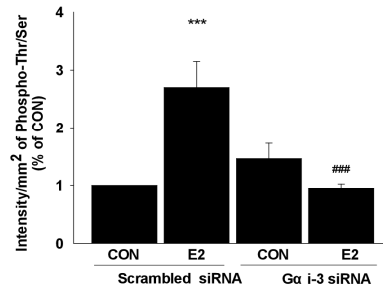

Figure 8C

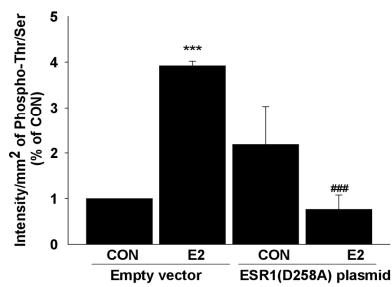

Figure S4. Semi-quantitative analysis of western blot for Figure 6 to Figure 8.
